# Supplementary material for: Baseline factors associated with response to ruxolitinib: an independent study on 408 patients with myelofibrosis
Source: PubMed Central journal article supplement (PMC5668021; doi:10.18632/oncotarget.18674), 2017-06-27
Supplement: oncotarget-08-79073-s001.pdf [file oncotarget-08-79073-s001.pdf]

## Baseline factors associated with response to ruxolitinib: an independent study on 408 patients with myelofibrosis

### SUPPLEMENTARY MATERIALS

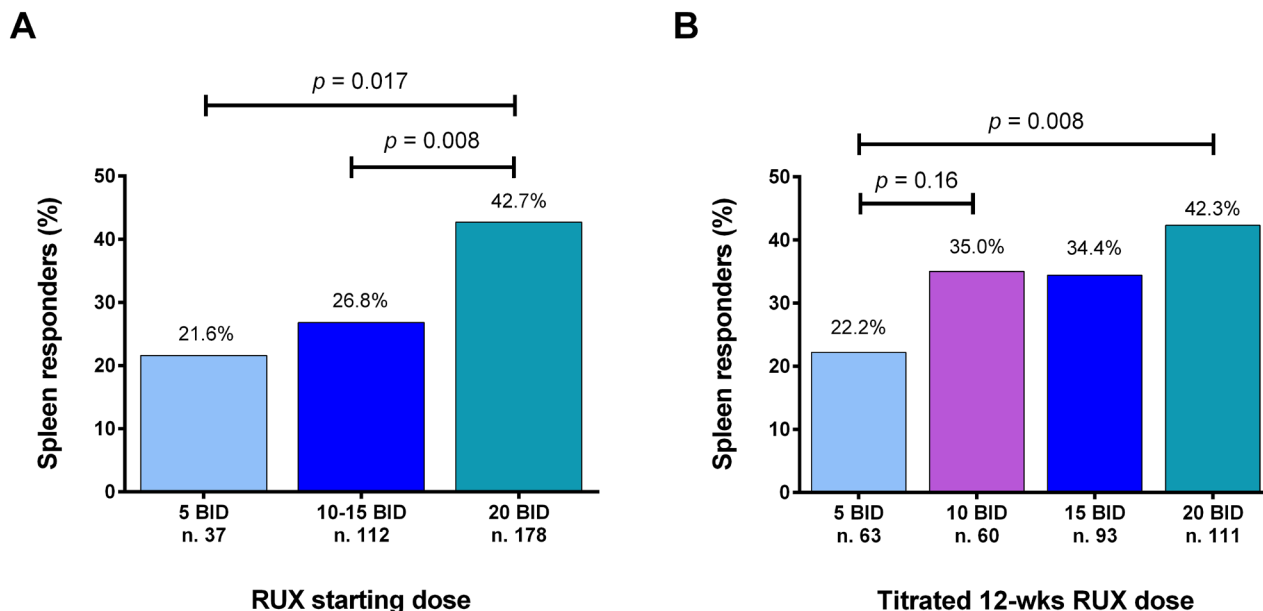

**Supplementary Figure 1:** Spleen response according to ruxolitinib starting (A) and 12-weeks titrated (B) dose. Percentages are calculated on 327 evaluable patients. Patients starting with doses higher or equal to 20 mg BID had the greatest probability of spleen response (42.7% versus 25.5% of patients starting with lower doses, *p*=0.001); also, 100 patients out of 264 (37.9%) maintaining average doses  $\geq$ 10 mg BID during the first 12 weeks of therapy had a spleen response at 6 months versus 14 out of 63 (22.2%) patients titrated at lower doses (*p*=0.019).

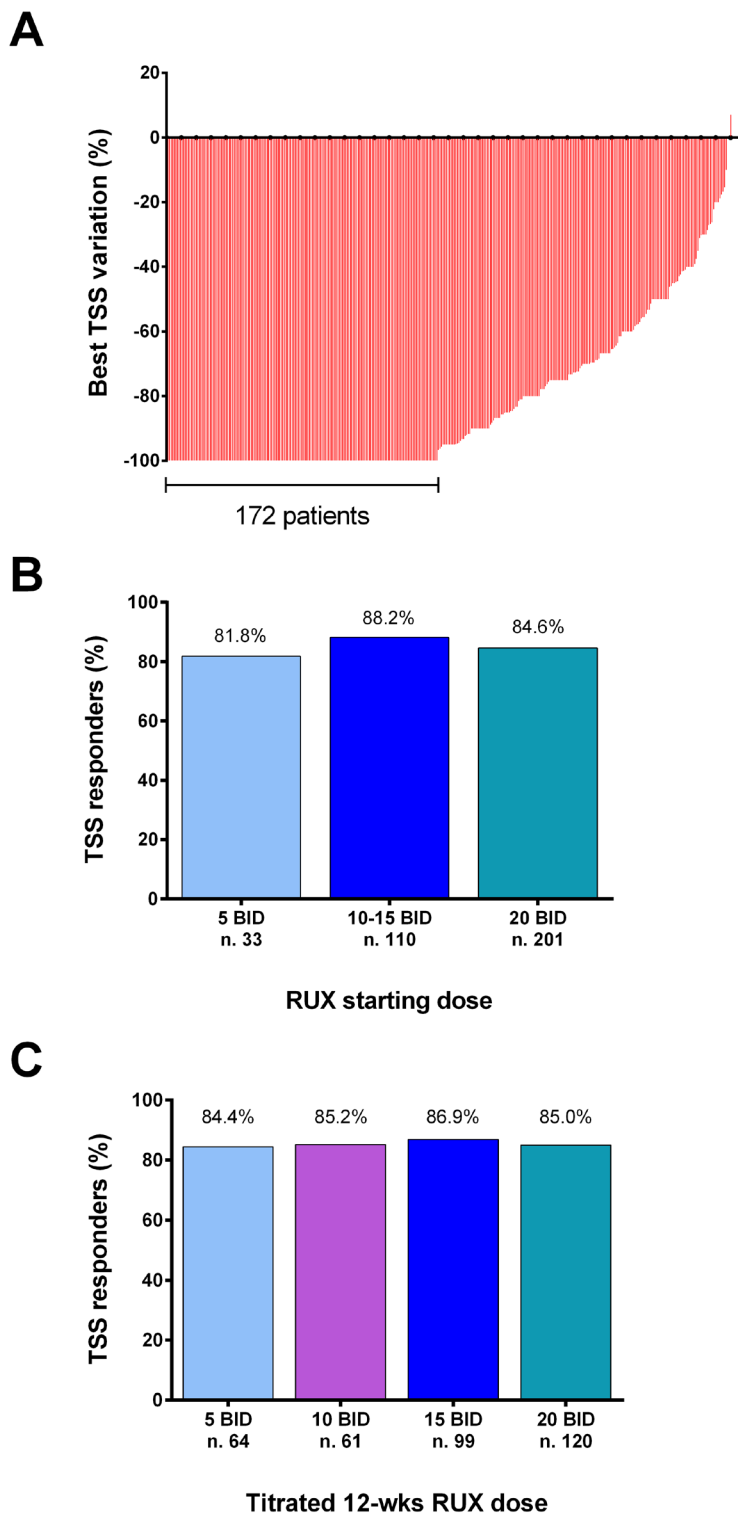

**Supplementary Figure 2: Symptoms response.** Best percent change from baseline in Total Symptom Score (TSS) at any time (A). Each bar represents data from an individual patient. Percentage of patients achieving a symptoms response at 6 months according to ruxolitinib starting (B) and titrated (C) dose during the first 12 weeks of treatment.

**Supplementary Table 1: Comparison of spleen and symptoms responses observed in prospective studies and in the present “real-life” study**

| Clinical trial (n. of patients) | Percentage of patients at intermediate-1 IPSS risk | Spleen response at week 24 | Definition of spleen responses | Symptom response at week 24 | Definition of symptoms responses                             |
|---------------------------------|----------------------------------------------------|----------------------------|--------------------------------|-----------------------------|--------------------------------------------------------------|
| COMFORT-I (n. 155)              | 0                                                  | 41.9%                      | ≥35% volume reduction (MRI)    | 45.9%                       | 2013 IWG-MRT criteria (≥50% TSS reduction from baseline)     |
| COMFORT-II (n. 146)             | 0                                                  | 32%                        | ≥35% volume reduction (MRI)    | N.R.                        | Improvement in different scales                              |
| JUMP (n. 1144)                  | 14.2%                                              | 56.9%                      | ≥50% length reduction*         | 44% - 52%                   | Minimally important difference according to different scales |
| ROBUST (n. 48)                  | 29.2%                                              | 54.2%                      | ≥50% length reduction*         | 54.2%                       | 2013 IWG-MRT criteria (≥50% TSS reduction from baseline)     |
| Present Study (n. 408)          | 15.7%                                              | 34.9%                      | 2013 IWG-MRT criteria*         | 85.5%                       | 2013 IWG-MRT criteria (≥50% TSS reduction from baseline)     |

\*Spleen length was assessed by palpation. TSS: 10-item Total Symptom Score.
